# Supplementary material for: Large-Scale Development of Gene-Associated Single-Nucleotide Polymorphism Markers for Molluscan Population Genomic, Comparative Genomic, and Genome-Wide Association Studies
Source: PubMed Central journal article supplement — DNA Res. 2013 Nov 25;21(2):183–93. doi: 10.1093/dnares/dst048 (PMC3989488; doi:10.1093/dnares/dst048), 2013-11-25
Supplement: supp_dst048_dst048supp_table2.pdf [file supp_dst048_dst048supp_table2.pdf]

**Supplementary Table S2. KEGG biochemical mapping for the *C. farreri* SNP markers.**

| KEGG categories represented                 | Unique sequences (Number of enzymes) |                  |
|---------------------------------------------|--------------------------------------|------------------|
|                                             | Total contigs                        | SNP contigs      |
| <b>Metabolism</b>                           | <b>1779 (1000)</b>                   | <b>175 (72)</b>  |
| Carbohydrate Metabolism                     | 409 (229)                            | 38 (11)          |
| Amino Acid Metabolism                       | 376 (218)                            | 19 (11)          |
| Lipid Metabolism                            | 298 (164)                            | 21 (12)          |
| Energy Metabolism                           | 261 (159)                            | 16 (4)           |
| Nucleotide Metabolism                       | 246 (138)                            | 28 (2)           |
| Metabolism of Cofactors and Vitamins        | 231 (120)                            | 8 (6)            |
| Glycan Biosynthesis and Metabolism          | 209 (122)                            | 19 (10)          |
| Metabolism of Other Amino Acids             | 152 (68)                             | 10 (6)           |
| Xenobiotics Biodegradation and Metabolism   | 135 (60)                             | 12 (6)           |
| Metabolism of Terpenoids and Polyketides    | 51 (31)                              | 1 (1)            |
| Biosynthesis of Other Secondary Metabolites | 42 (24)                              | 3 (3)            |
| <b>Genetic Information Processing</b>       | <b>1589 (807)</b>                    | <b>118 (21)</b>  |
| Folding, Sorting and Degradation            | 610 (320)                            | 36 (7)           |
| Translation                                 | 531 (245)                            | 40 (5)           |
| Transcription                               | 296 (157)                            | 23 (3)           |
| Replication and Repair                      | 213 (117)                            | 19 (6)           |
| <b>Environmental Information Processing</b> | <b>670 (453)</b>                     | <b>42 (15)</b>   |
| Signal Transduction                         | 469 (296)                            | 36 (12)          |
| Signaling Molecules and Interaction         | 113 (91)                             | 5 (2)            |
| Membrane Transport                          | 107 (84)                             | 1 (1)            |
| <b>Cellular Processes</b>                   | <b>993 (539)</b>                     | <b>85 (15)</b>   |
| Transport and Catabolism                    | 511 (256)                            | 31 (5)           |
| Cell Growth and Death                       | 277 (156)                            | 20 (5)           |
| Cell Communication                          | 220 (123)                            | 25 (4)           |
| Cell Motility                               | 124 (73)                             | 9 (1)            |
| <b>Total</b>                                | <b>4616(2580)</b>                    | <b>420 (123)</b> |
